# Supplementary material for: Heme protects Pseudomonas aeruginosa and Staphylococcus aureus from calprotectin-induced iron starvation
Source: PubMed Central journal article supplement (PMC7948498; doi:10.1074/jbc.ra120.015975), 2020-12-09
Supplement: mmc1.pdf [file mmc1.pdf]

**Heme protects *Pseudomonas aeruginosa* and *Staphylococcus aureus* from calprotectin-induced iron starvation**

Emily M. Zygiel<sup>1</sup>, Adunoluwa O. Obisesan<sup>1</sup>, Cassandra E. Nelson<sup>2</sup>, Amanda G. Oglesby<sup>3,\*</sup>, Elizabeth M. Nolan<sup>1,\*</sup>

<sup>1</sup> Department of Chemistry, Massachusetts Institute of Technology, Cambridge, MA 02139, USA

<sup>2</sup> School of Pharmacy, Department of Pharmaceutical Sciences, University of Maryland, Baltimore, MD 21201, USA

<sup>3</sup> School of Medicine, Department of Microbiology and Immunology, University of Maryland, Baltimore, MD, 21021, USA

\*Corresponding author:

[lnolan@mit.edu](mailto:lnolan@mit.edu), Phone: 617-452-2495

[aoglesby@rx.umaryland.edu](mailto:aoglesby@rx.umaryland.edu), Phone: 410-706-8650

## TABLE OF CONTENTS

### Supplementary tables

|                                                                                                             |    |
|-------------------------------------------------------------------------------------------------------------|----|
| <b>Table S1.</b> ICP-MS analysis of LB and Tris:TSB media.....                                              | S3 |
| <b>Table S2.</b> Strains used in this study.....                                                            | S4 |
| <b>Table S3.</b> Primers and probes used for RT-PCR.....                                                    | S5 |
| <b>Table S4.</b> OD <sub>600</sub> values of <i>S. aureus</i> cultures following CP and heme treatment..... | S6 |

### Supplementary figures

|                                                                                                                                  |     |
|----------------------------------------------------------------------------------------------------------------------------------|-----|
| <b>Figure S1.</b> Effect of CP and heme on PAO1 metal uptake .....                                                               | S7  |
| <b>Figure S2.</b> Effect of CP and heme on PA14 metal uptake in CDM.....                                                         | S8  |
| <b>Figure S3.</b> Effect of CP and heme on PA14 metal uptake in Tris:TSB.....                                                    | S8  |
| <b>Figure S4.</b> CP inhibits metal uptake by multiple <i>S. aureus</i> strains. ....                                            | S9  |
| <b>Figure S5.</b> CP does not affect the CAS assay.....                                                                          | S10 |
| <b>Figure S6.</b> Effect of CP and heme on <i>S. aureus</i> metal uptake.....                                                    | S11 |
| <b>Figure S7.</b> Effect of CP and heme on the growth of <i>P. aeruginosa</i> and <i>S. aureus</i> .....                         | S12 |
| <b>Figure S8.</b> Model for the effect of heme on CP-mediated iron starvation in <i>S. aureus</i> based on the current work..... | S13 |
| <b>Supporting References</b> .....                                                                                               | S14 |

**Table S1.** Representative ICP-MS analysis of LB and Tris:TSB media.

| <b>Element</b> | <b>LB (<math>\mu\text{M}</math>)</b> | <b>Tris:TSB (<math>\mu\text{M}</math>)</b> |
|----------------|--------------------------------------|--------------------------------------------|
| <b>Mg</b>      | 77.8                                 | 164.0                                      |
| <b>Ca</b>      | 149                                  | 79.1                                       |
| <b>Mn</b>      | 0.275                                | 0.157                                      |
| <b>Fe</b>      | 7.89                                 | 4.25                                       |
| <b>Co</b>      | 0.164                                | 0.052                                      |
| <b>Ni</b>      | 0.001                                | 1.14                                       |
| <b>Cu</b>      | 0.214                                | 0.257                                      |
| <b>Zn</b>      | 15.6                                 | 5.39                                       |

**Table S2.** Strains used in this study.

| <b>Strain</b>                                                     | <b>Description</b>                                                                                                 | <b>Reference</b>                                         |
|-------------------------------------------------------------------|--------------------------------------------------------------------------------------------------------------------|----------------------------------------------------------|
| <i>S. aureus</i> USA300                                           | Methicillin-resistant strain                                                                                       | (1)                                                      |
| <i>S. aureus</i> USA300 JE2                                       | Parent strain of NTML Collection; community isolate; methicillin-resistant                                         | (2)                                                      |
| <i>S. aureus</i> Newman                                           | Laboratory strain                                                                                                  | (3), (4) Courtesy of Tony Richardson                     |
| <i>S. aureus</i> P1                                               | Longitudinal CF isolate, type USA300, #2050                                                                        | (5)                                                      |
| <i>S. aureus</i> P2                                               | Longitudinal CF isolate, type USA300, #2059                                                                        | (5)                                                      |
| <i>S. aureus</i> P3                                               | Longitudinal CF isolate, type USA300, #2089                                                                        | (5)                                                      |
| <i>S. aureus</i> COL                                              | Methicillin-resistant strain                                                                                       | MRSA Clinical Isolate, 1961, Courtesy of Tony Richardson |
| <i>S. aureus</i> M2                                               | Laboratory strain of MRSA                                                                                          | (6)                                                      |
| <i>P. aeruginosa</i> PAO1                                         | <i>Pa</i> laboratory strain                                                                                        | (7)                                                      |
| <i>P. aeruginosa</i> PAO1 $\Delta$ <i>hasRphuR</i>                | <i>hasR</i> and <i>phuR</i> knockout strain                                                                        | (8)                                                      |
| <i>P. aeruginosa</i> PA14                                         | Clinical isolate UCBPP-PA14                                                                                        | (9), Courtesy of Dianne Newman                           |
| <i>P. aeruginosa</i> PAO1/ $P_{antR}$ - <i>lacZ</i> <sup>SD</sup> | PAO1 with the $P_{antR}$ - <i>lacZ</i> <sup>SD</sup> reporter fusion integrated at the chromosomal <i>att</i> site | (10)                                                     |

**Table S3.** Primers and probes used for RT-PCR.

| <b>Target</b>   | <b>Sequence</b>                   | <b>Reference</b> |
|-----------------|-----------------------------------|------------------|
| <b>Primers</b>  |                                   |                  |
| <i>oprF</i> (f) | GCG TTC GCA ACA TGA AGA AC        | (11)             |
| <i>oprF</i> (r) | CTT CTT GTT GCC GGT TTC GTA       | (11)             |
| <i>phuS</i> (f) | TGC CGA CGA ACA CCA TGA           | (12)             |
| <i>phuS</i> (r) | TGG CGA CCT GGC GAA A             | (12)             |
| <i>hasA</i> (f) | ATC GAC GCG CTG CTG AA            | (13)             |
| <i>hasA</i> (r) | TGG TCG AAG GTG GAG TTG ATC       | (13)             |
| <i>hasR</i> (f) | CGT GGC GTC GAG TAC CAG           | (13)             |
| <i>hasR</i> (r) | GGT CTT CGA ACA GAA GTC GTT G     | (13)             |
| <i>sigA</i> (f) | TGG TGC TGG ATC TCG ACC TA        |                  |
| <i>sigA</i> (r) | TGC AAT TGC TGA CCA AGC AC        |                  |
| <i>sirA</i> (f) | ACG CGA CAA TTA AGT CCG GT        |                  |
| <i>sirA</i> (r) | CCA CTG ACG TCG CTG TAT CT        |                  |
| <i>isdC</i> (f) | CTG CCA AAG ATG AAC GCA CT        |                  |
| <i>isdC</i> (r) | GCA CCT GCT ACA TCA GTT GGT       |                  |
| <b>Probes</b>   |                                   |                  |
| <i>oprF</i>     | CGG TGA GTA CCA TGA CGT TCG TGG C | (11)             |
| <i>hasA</i>     | TCG ACC CGA GCC TGT               | (13)             |
| <i>hasR</i>     | CTG GCC TAC GGG CAG CTC TCC TA    | (13)             |
| <i>phuS</i>     | CTT TCG GCC GCC GCT TCG A         | (12)             |

**Table S4.** OD<sub>600</sub> values of *S. aureus* cultures following CP and heme treatment.

| <b>Treatment</b> | <b>JE2 OD<sub>600</sub></b><br>(range, N = 5) |
|------------------|-----------------------------------------------|
| <b>Untreated</b> | 3.7 – 3.9                                     |
| <b>CP</b>        | 2.3 – 3.1                                     |
| <b>Heme</b>      | 3.2 – 3.8                                     |
| <b>CP + heme</b> | 2.3 – 2.5                                     |

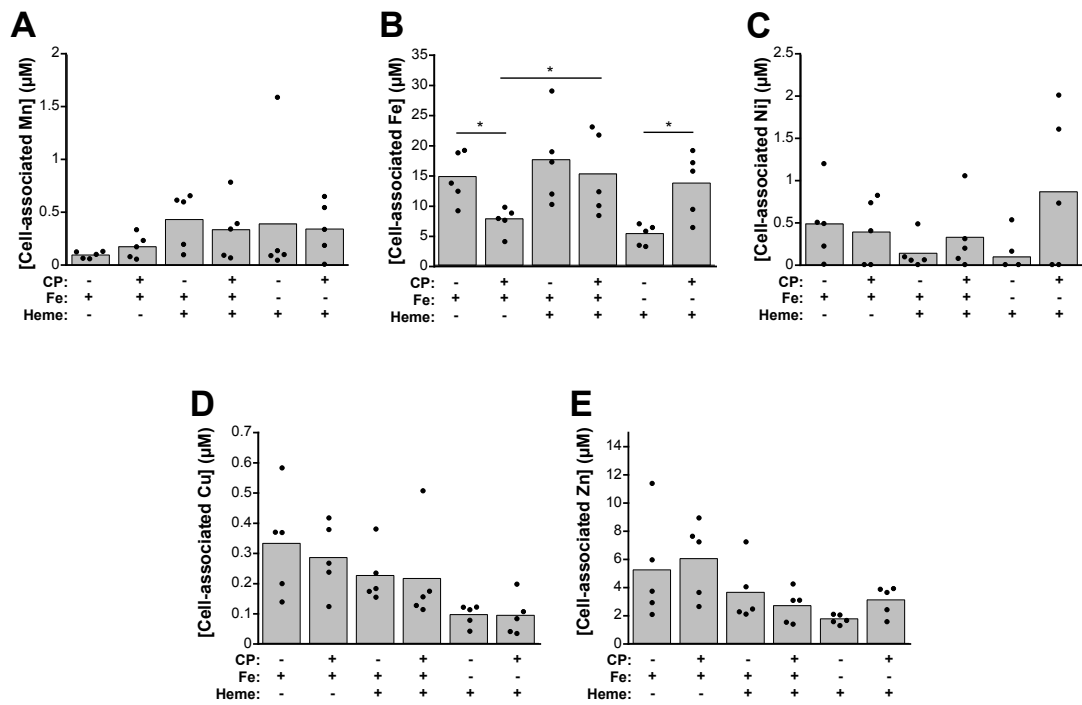

**Figure S1.** Effect of CP and heme on PAO1 metal uptake. Cell-associated metal in *P. aeruginosa* PAO1 grown in CDM or Fe-depleted CDM in the absence or presence of CP (10  $\mu\text{M}$ ) and heme (5  $\mu\text{M}$ ) (N = 5, \* $P$  < 0.05). CP, calprotectin; CDM, chemically defined medium.

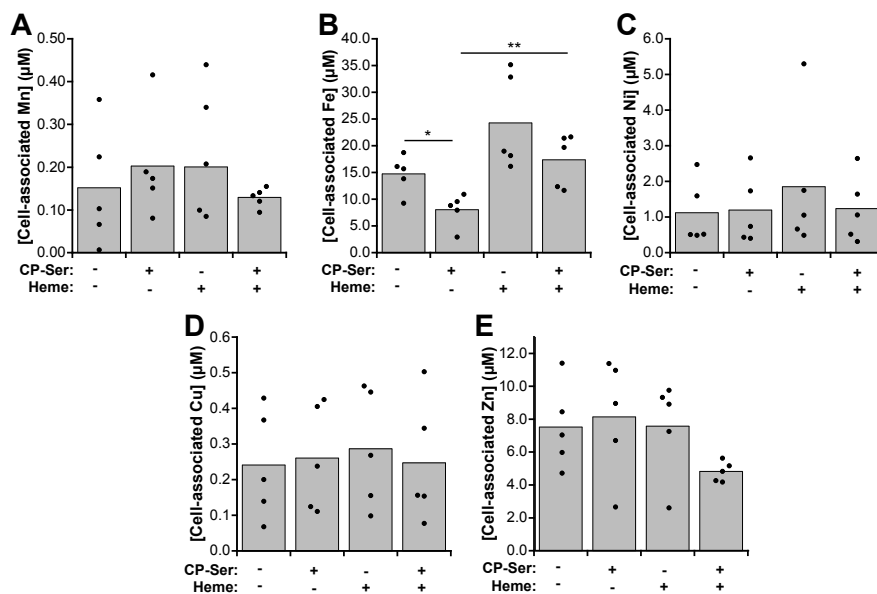

**Figure S2.** Effect of CP and heme on PA14 metal uptake in CDM. Cell-associated metal in *P. aeruginosa* PA14 grown in CDM in the absence or presence of CP-Ser (10  $\mu\text{M}$ ) and heme (5  $\mu\text{M}$ ) (N = 5, \* $P$  < 0.05, \*\*  $P$  < 0.01). CP, calprotectin; CDM, chemically defined medium.

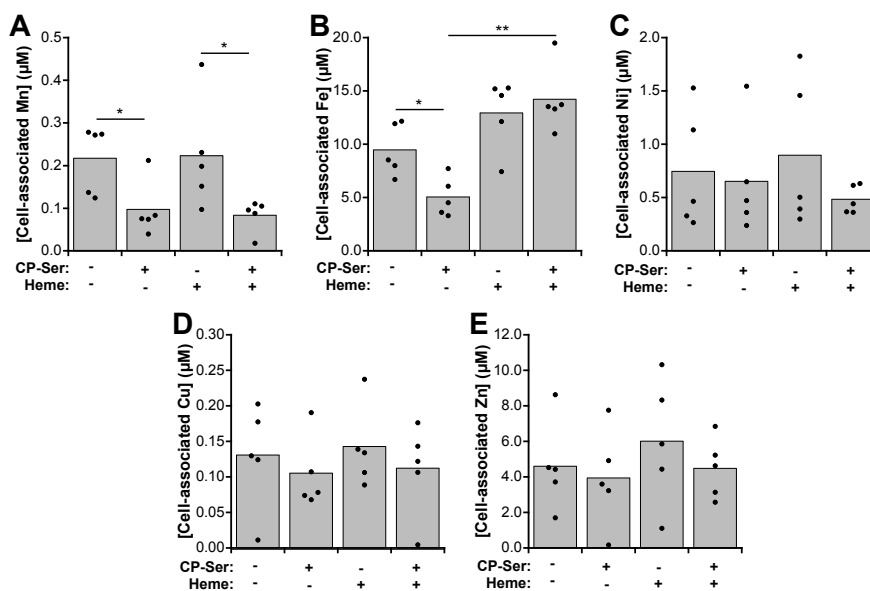

**Figure S3.** Effect of CP and heme on PA14 metal uptake in Tris:TSB. Cell-associated metal in *P. aeruginosa* PA14 grown in Tris:TSB in the absence or presence of CP-Ser (10  $\mu\text{M}$ ) and heme (5  $\mu\text{M}$ ) (N = 5, \* $P$  < 0.05, \*\*  $P$  < 0.01). CP, calprotectin.



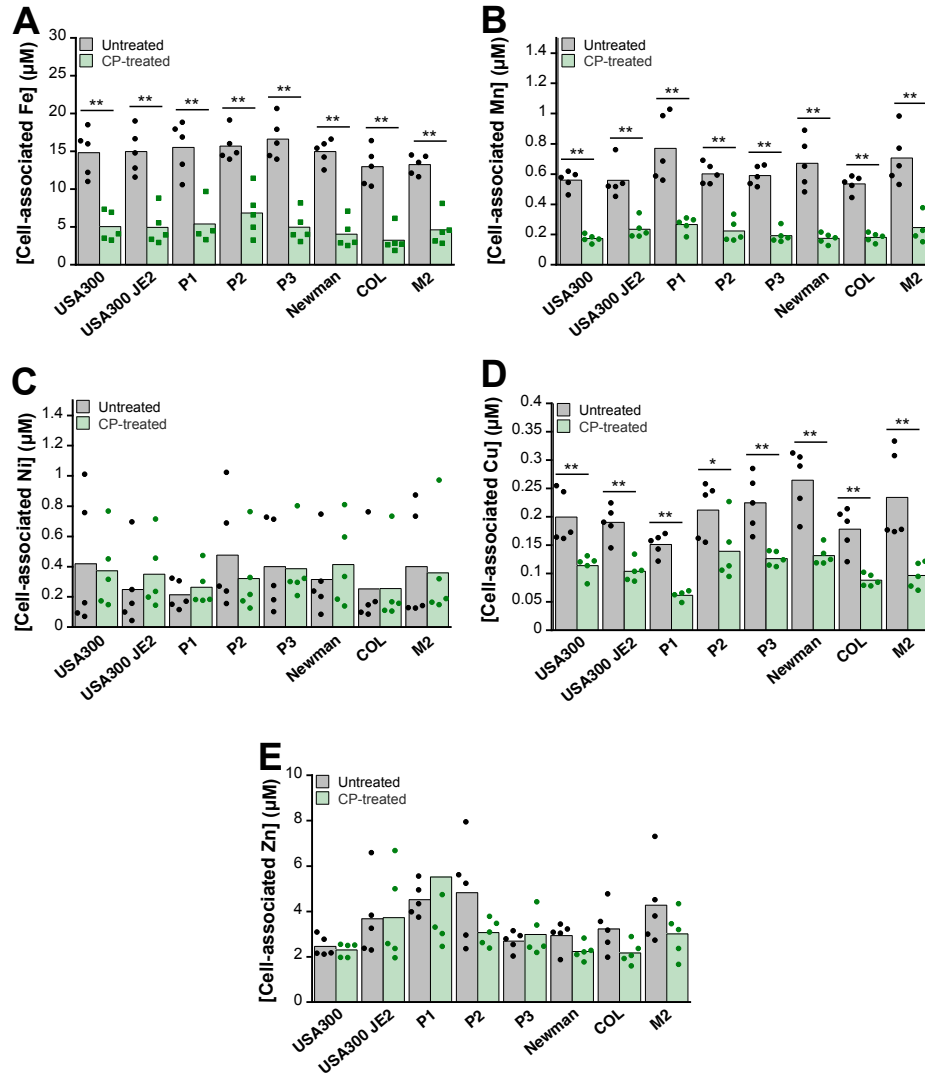

**Figure S4.** CP inhibits metal uptake by multiple *S. aureus* strains. Cell-associated metal levels for *S. aureus* strains (Table S2) grown in LB in the absence or presence of CP (20  $\mu\text{M}$ ) (N = 5, \* $P$  < 0.05, \*\* $P$  < 0.01). CP, calprotectin.

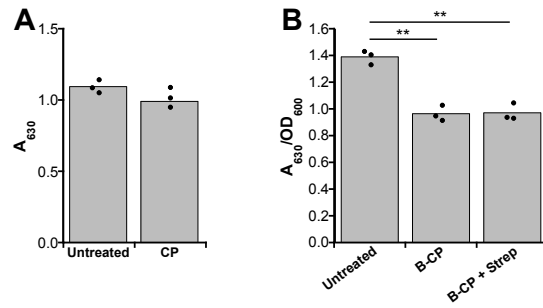

**Figure S5.** CP does not affect the CAS assay. (A) CAS dye (500  $\mu$ L) was incubated with 500  $\mu$ L Tris buffer (untreated) or 500  $\mu$ L 20  $\mu$ M CP prepared in Tris buffer (CP) for one hour before measuring the absorbance at 630 nm. (B) *S. aureus* USA300 JE2 was grown in LB the absence or presence of B-CP (20  $\mu$ M). Supernatants harvested from B-CP treated cultures were split into two separate aliquots and B-CP was pulled down via treatment with streptavidin agarose resin (+ Strep) in one aliquot while the other was left untreated. A CAS assay was performed on each supernatant aliquot.  $A_{630}$  measurements were normalized to culture  $OD_{600}$  (N = 3, \*\* $P$  < 0.01). CP, calprotectin.

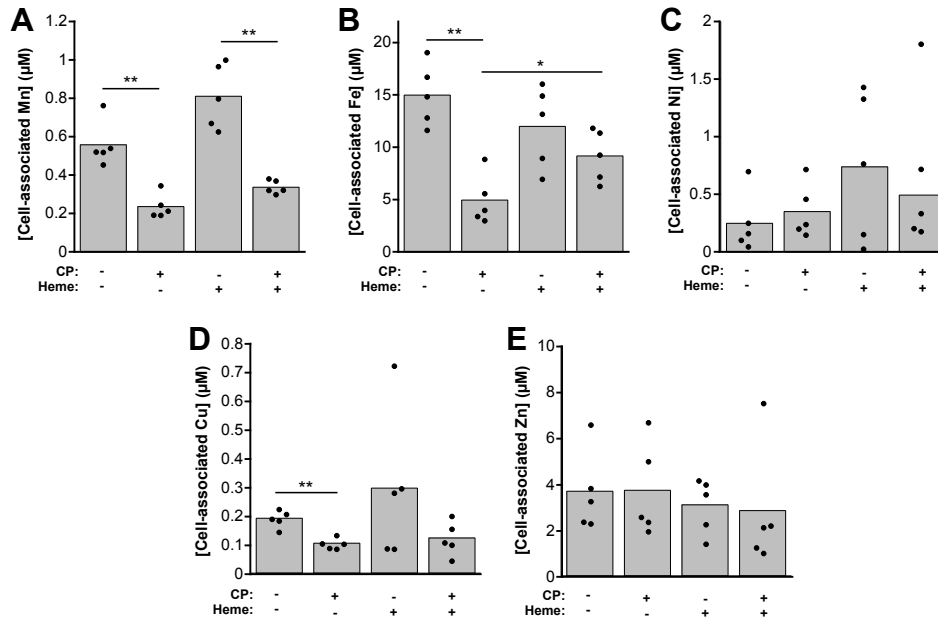

**Figure S6.** Effect of CP and heme on *S. aureus* metal uptake. Cell-associated metal for *S. aureus* USA300 JE2 grown in LB in the absence or presence of CP (20  $\mu\text{M}$ ) and heme (5  $\mu\text{M}$ ). (N = 5, \* $P$  < 0.05, \*\* $P$  < 0.01). CP, calprotectin.

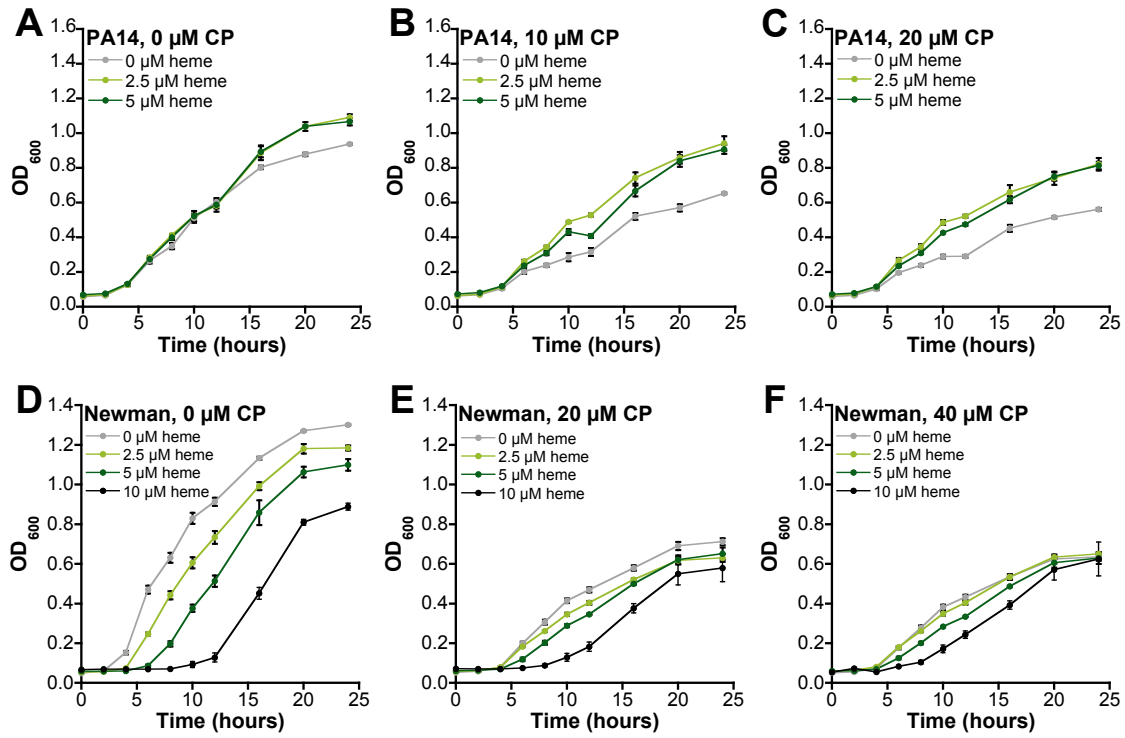

**Figure S7.** Effect of CP and heme on the growth of *P. aeruginosa* and *S. aureus*. (A-C) *P. aeruginosa* PA14 was grown in Tris:TSB and treated with 0, 10, or 20 μM CP and 0, 2.5, or 5 μM heme. (D-F) *S. aureus* Newman was grown in LB with 0, 20, or 40 μM CP and 0, 2.5, 5, or 10 μM heme (N = 3, SEM, \*P < 0.05). CP, calprotectin.

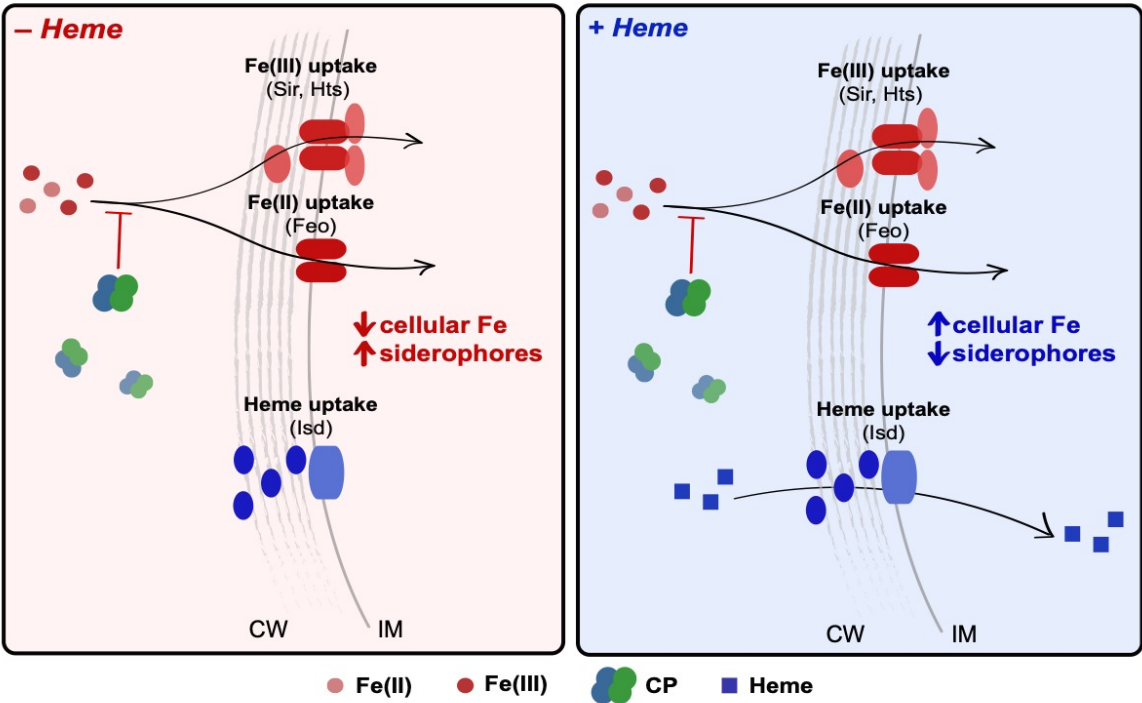

**Figure S8.** Model for the effect of heme on CP-mediated iron starvation in *S. aureus* based on the current work. (Left) When heme is unavailable, CP inhibits *S. aureus* iron uptake and promotes siderophore production. (Right) When heme is available, *S. aureus* can utilize heme to mitigate the effect of CP on iron uptake, which alleviates its iron starvation responses to CP. CP, calprotectin; CW, cell wall; IM, inner membrane.

## Supporting references

1. McDougal, L. K., Steward, C. D., Killgore, G. E., Chaitram, J. M., McAllister, S. K., and Tenover, F. C. (2003) Pulsed-field gel electrophoresis typing of oxacillin-resistant *Staphylococcus aureus* isolates from the United States: establishing a national database. *J. Clin. Microbiol.* **41**, 5113-5120
2. Fey, P. D., Endres, J. L., Yajjala, V. K., Widhelm, T. J., Boissy, R. J., Bose, J. L., and Bayles, K. W. (2013) A genetic resource for rapid and comprehensive phenoype screening of nonessential *Staphylococcus aureus* genes. *MBio* **4**, e00537-12
3. Baba, T., Bae, T., Schneewind, O., Takeuchi, F., and Hiramatsu, K. (2008) Genome sequence of *Staphylococcus aureus* strain Newman and comparative analysis of staphylococcal genomes: polymorphism and evolution of two major pathogenicity islands. *J. Bacteriol.* **190**, 300-10
4. Duthie, E. S., and Lorenz, L. L. (1952) Staphylococcal coagulase; mode of action and antigenicity. *J. Gen. Microbiol.* **6**, 95-107
5. Harik, N. S., Com, G., Tang, X., Melguizo Castro, M., Stemper, M. E., and Carroll, J. L. (2016) Clinical characteristics and epidemiology of methicillin-resistant *Staphylococcus aureus* (MRSA) in children with cystic fibrosis from a center with a high MRSA prevalence. *Am. J. Infect. Control.* **44**, 409-415
6. Harro, J. M., Daugherty, S., Bruno, V. M., Jabra-Rizk, M. A., Rasko, D. A., and Shirtliff, M. E. (2013) Draft genome sequence of the methicillin-resistant *Staphylococcus aureus* Isolate MRSA-M2. *Genome Announc.* **1**, e00037-12
7. Holloway, B. W. (1955) Genetic recombination in *Pseudomonas aeruginosa*. *J. Gen. Microbiol.* **13**, 572-581
8. Smith, A. D., and Wilks, A. (2015) Differential contributions of the outer membrane receptors PhuR and HasR to heme acquisition in *Pseudomonas aeruginosa*. *J. Biol. Chem.* **290**, 7756-66
9. Rahme, L. G., Stevens, E. J., Wolfort, S. F., Shao, J., Tompkins, R. G., and Ausubel, F. M. (1995) Common virulence factors for bacterial pathogenicity in plants and animals. *Science* **268**, 1899-1902
10. Djapgne, L., Panja, S., Brewer, L. K., Gans, J. H., Kane, M. A., Woodson, S. A., and Oglesby-Sherrouse, A. G. (2018) The *Pseudomonas aeruginosa* PrrF1 and PrrF2 small regulatory RNAs promote 2-alkyl-4-quinolone production through redundant regulation of the *antR* mRNA. *J. Bacteriol.* **200**, e00704-17
11. Reinhart, A. A., Nguyen, A. T., Brewer, L. K., Bevere, J., Jones, J. W., Kane, M. A., Damron, F. H., Barbier, M., and Oglesby-Sherrouse, A. G. (2017) The *Pseudomonas aeruginosa* PrrF small RNAs regulate iron homeostasis during acute murine lung infection. *Infect. Immun.* **85**, e00764-16
12. O'Neill, M. J., and Wilks, A. (2013) The *P. aeruginosa* heme binding protein PhuS is a heme oxygenase titratable regulator of heme uptake. *ACS Chem. Biol.* **8**, 1794-1802
13. Cenciarini, C., Courtois, S., Raoult, D., and La Scola, B. (2008) Influence of long time storage in mineral water on RNA stability of *Pseudomonas aeruginosa* and *Escherichia coli* after heat inactivation. *PLoS One* **3**, e3443
